# Supplementary material for: Structure and thermal properties of phosphorus-containing polyol synthesized from cardanol
Source: Royal Society of Chemistry journal article supplement (doi:10.1039/c5ra20749e), 2015-01-01
Supplement: c5ra20749e1.pdf [file c5ra20749e1.pdf]

## Structure and thermal properties of phosphorus-containing polyol synthesized from cardanol

Received 00th January 20xx,  
Accepted 00th January 20xx

DOI: 10.1039/x0xx00000x

www.rsc.org/

C.Y. Bo<sup>a</sup>, L.H. Hu<sup>b</sup>, P.Y. Jia<sup>a</sup>, B. C. Liang<sup>a</sup>, J. Zhou<sup>a</sup>, Y. H. Zhou<sup>a\*</sup>

### SI.1 The FT-IR spectra of 9,10-dihydro-9-oxa-10-phosphaphenanthrene-10-oxide (DOPO)

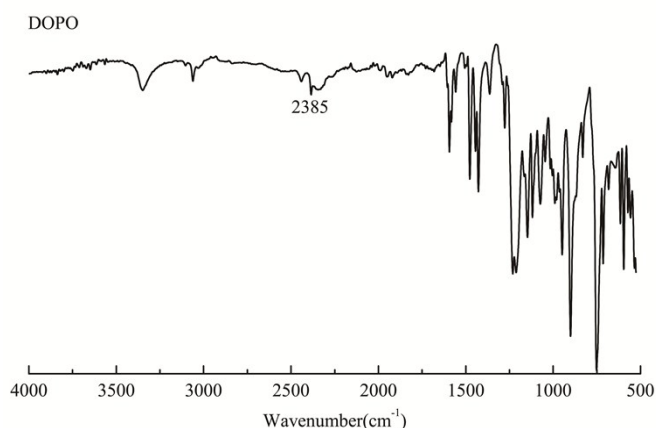

Figure SI.1 the FT-IR spectra of DOPO

Figure SI.1 shows the FT-IR spectra of the DOPO, in FT-IR analyses on DOPO, the stretching vibration at 2385 cm<sup>-1</sup> is for P—H,<sup>1</sup> the stretching vibration disappeared in PCP, implying that the reaction of P(O)—H of DOPO with cardanol diol (ECD) had occurred.

### SI.2 The <sup>1</sup>H NMR spectra of DOPO

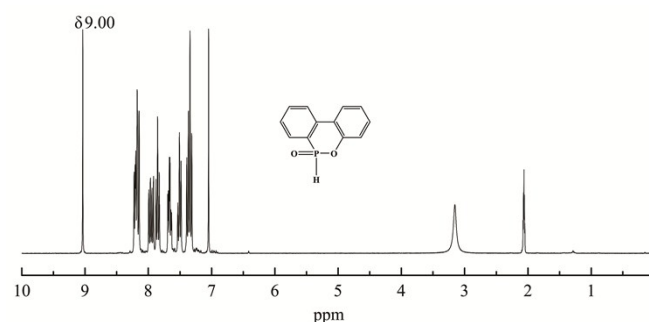

Figure SI.2 the <sup>1</sup>H NMR spectra of DOPO

Figure SI.2 shows the <sup>1</sup>H NMR spectra of the DOPO, in <sup>1</sup>H NMR analyses on DOPO, the peak at δ 9.00 is associated with the P—H,<sup>2</sup> which disappeared in the <sup>1</sup>H NMR spectrum of the resulting cardanol polyols (PCP). This result indicates that the epoxy groups of ECD was reacted with DOPO.

### References

- 1 K. S. Meenakshi, E. P. J. Sudhan, S. A. Kumar, and M. J. Umopathy, *Prog Org Coat.*, 2011, **72**, 402-409.
- 2 M. Zhang, Z. Luo, J. Zhang, S. Chen, and Y. Zhou, *Polym Degrad Stabil.*, 2015, **12**, 427-434.

<sup>a</sup> Institute of Chemical Industry of Forest Products, CAF; National Engineering Lab. for Biomass Chemical Utilization; Key and Open Lab. on Forest Chemical Engineering, SFA; Key Lab. Biomass Energy and Material, Jiangsu Province, Nanjing 210042, China. E-mail: zyh@icifp.cn Tel.: +86 25 85482520; Fax: +86 25 85413445

<sup>b</sup> Institute of New Technology of Forestry, CAF, Beijing 100091, China
